# Supplementary material for: Implication of Potential Differential Roles of the Two Phosphoglucomutase Isoforms in the Protozoan Parasite Cryptosporidium parvum
Source: MDPI journal article supplement (doi:10.3390/pathogens11010021), 2021-12-24
Supplement: s1 [file s1]

**Figure S1.** Sequence comparison between CpPGM1A and CpPGM1B proteins and annotation of active site residues

|         |                                                                                                                                                                               |     |
|---------|-------------------------------------------------------------------------------------------------------------------------------------------------------------------------------|-----|
| CpPGM1B | <b>MM</b> KILNILFSLVLVSQYVNANESVGNLRYLQKINLIEPTDGQAKVVTSD                                                                                                                     | 50  |
| CpPGM1B | VQINQGRALIKKKVSVVTRNVIETETTETYYYSDDKGLDAWSPNENDNLLD                                                                                                                           | 100 |
| CpPGM1A | <b>MEQ</b> VQ <b>VT</b> PYLDQKPGT <b>S</b> GLRKKTRVFMEGTYLANFIESYFQSFPPENF                                                                                                    | 48  |
| CpPGM1B | <b>MLVQE</b> VQ <b>IS</b> PYLDQKPGT <b>S</b> GLRKKTRVFMEGTYLANFIESYFQSFPPENF                                                                                                  | 150 |
| CpPGM1A | EGATLLVAGDGRFFLPEAIQIIISEIAAAHKKVKRIWTGVNGLCSTPAGSAI                                                                                                                          | 98  |
| CpPGM1B | EGATLLVAGDGRFFLPEAIQIIISEIAAAHKKVKRIWTGVNGLCSTPAGSAI                                                                                                                          | 200 |
| CpPGM1A | IREREGGIAVGGILLTA <b>S</b> HNPGGIDEDFGVKFN <b>G</b> KNGGPAQDSVTN <b>T</b> IFE                                                                                                 | 148 |
| CpPGM1B | IREREGGIAVGGILLTA <b>S</b> HNPGGIDEDFGVKFN <b>E</b> KNGGPAQDSVTN <b>A</b> IFE                                                                                                 | 250 |
| CpPGM1A | ITKKLTSSYKKISLPKIDLSKIGVQELIPNQFTVEVIDTSEDWLKLMKKIF                                                                                                                           | 198 |
| CpPGM1B | ITKKLTSSYKKISLPKIDLSKIGVQELIPNQFTVEVIDTSEDWLKLMKKIF                                                                                                                           | 300 |
| CpPGM1A | DFQKIQNLLNRKDFK <b>M</b> AFDSMHGVAGPYARKL <b>F</b> VDEFGLPESSLLHLESK                                                                                                          | 248 |
| CpPGM1B | DFQKIQNLLNRKDFK <b>M</b> VFDSMHGVAGPYARKL <b>I</b> DEFGLPESSLLHLESK                                                                                                           | 350 |
| CpPGM1A | PDFGGLHDPNLTAKDLVELMKVKSPKVDK <b>S</b> TPDFGAAG <b>D</b> <b>G</b> <b>D</b> <b>C</b> <b>D</b> <b>R</b> NMI                                                                     | 298 |
| CpPGM1B | PDFGGLHDPNLTAKDLVELMKVKSPKVDK <b>N</b> TPDFGAAG <b>D</b> <b>G</b> <b>D</b> <b>C</b> <b>D</b> <b>R</b> NMI                                                                     | 400 |
| CpPGM1A | LKGFFVTPSDSVAIIASYAKEAIPYFSKGLAGVSRSM <b>P</b> TSTSLNNVAEK                                                                                                                    | 348 |
| CpPGM1B | LKGFFVTPSDSVAIIASYAKEAIPYFSKGLAGVSRSM <b>P</b> TSTSLNNVAEK                                                                                                                    | 450 |
| CpPGM1A | LGIPCYEVP <b>T</b> <b>G</b> <b>W</b> KYFGNLMDAKMIDIC <b>G</b> <b>E</b> <b>E</b> <b>S</b> <b>F</b> <b>G</b> TGSDHIRE <b>K</b> DGLWAVLA                                         | 398 |
| CpPGM1B | LGIPCYEVP <b>T</b> <b>G</b> <b>W</b> KYFGNLMDAKMIDIC <b>G</b> <b>E</b> <b>E</b> <b>S</b> <b>F</b> <b>G</b> TGSDHIRE <b>K</b> DGLWAVLA                                         | 500 |
| CpPGM1A | WLSILAH <b>H</b> KNPDPTK <b>P</b> LVSVEDITREFWKTYGRNYYTRFDYES <b>I</b> ETEKADQ                                                                                                | 448 |
| CpPGM1B | WLSILAY <b>Y</b> KNPDPTK <b>S</b> LVSVEDITREFWKTYGRNYYTRFDYES <b>V</b> ETEKADQ                                                                                                | 550 |
| CpPGM1A | FFKHLNSLMED <b>H</b> QKLREIIKPY <b>G</b> IDIKLTDNFTYNDPVD <b>K</b> SVAKNQGLRF                                                                                                 | 498 |
| CpPGM1B | FFKHLNSLMED <b>S</b> QKLRLNSLRSS <b>G</b> LKVK <b>F</b> MDNFTYNDPVD <b>G</b> SVTKNQGVRI                                                                                       | 600 |
| CpPGM1A | IFQ <b>D</b> NSRVV <b>F</b> <b>R</b> <b>L</b> <b>S</b> <b>G</b> <b>T</b> GSVGAT <b>I</b> <b>R</b> <b>I</b> <b>Y</b> IEKTVSDQTKVNST <b>S</b> NEIL <b>G</b> DLIEI               | 548 |
| CpPGM1B | IF <b>T</b> <b>D</b> GSRI <b>I</b> <b>F</b> <b>R</b> <b>I</b> <b>S</b> <b>G</b> <b>T</b> GSVGAT <b>I</b> <b>R</b> <b>V</b> <b>Y</b> MEKTVKNPQEFKTT <b>Q</b> QAL <b>N</b> HLEI | 650 |
| CpPGM1A | VEKKIKLKE <b>S</b> TGRDRPTVIT                                                                                                                                                 | 568 |
| CpPGM1B | VEKKIKLKE <b>I</b> TGR <b>S</b> KPTVIT                                                                                                                                        | 670 |

**Note:** **X** = Conserved active site residue based on structure 1KFI\_A (*Paramecium tetraurelia* parafusin)  
**X** = Conserved metal ( $Mg^{2+}$ ) binding site residues based on structure 3PMG\_A (*Oryctolagus cuniculus* Phosphoglucomutase)  
**X** = Conserved substrate binding site residue based on the structures of *Candida albicans* AGM1 (N-Acetylglucosamine-phosphate mutase) and *Pseudomonas aeruginosa* PMM/PGM bound to their substrates.  
**X** = Mismatched residues between CpPGM1A and CpPGM1B
