# Supplementary material for: Implication of Potential Differential Roles of the Two Phosphoglucomutase Isoforms in the Protozoan Parasite Cryptosporidium parvum
Source: MDPI journal article supplement (doi:10.3390/pathogens11010021), 2021-12-24
Supplement: s1 [file s1]

Figure S2

Comparison between CpPGM1A and CpPGM1B at nucleotide and protein levels, showing that *CpPGM1A* and *CpPGM1B* genes are tandemly duplicated. They are highly conserved at both protein and nucleotide levels

### Gene arrangement in the chromosome

cgd2\_3260 (CpPGM1A)

cgd2\_3270 (CpPGM1B)

### DNA sequence alignment

|           |                                                                                                                                                                |       |
|-----------|----------------------------------------------------------------------------------------------------------------------------------------------------------------|-------|
| cgd2_3260 | ATGG                                                                                                                                                           | ----- |
| cgd2_3270 | ATGATGAAAAATTTTGAAACATCTCTTTTCATTAGTCTTGTGAAGTCAGTATGTCAATGCAAAAGAAAGTGTGGGAATTTGAGATATTTGCAGAAAAATAATCTGATCGAACCTACCGATGGTCAAGCAAAAGTAGTTACCTCCAGGATGTTCA     |       |
| cgd2_3260 | -----                                                                                                                                                          |       |
| cgd2_3270 | AAATTAATCAGGGAAGGCCCTAATTAAGAAGAAAGTGCCTAGTAAACAAGAAATGTCATTGAAACCGAAACCACTGAGACTTATTATTATTCAGATAAAGGCTTAGATGCTTGGAGTCTAATGAAAAATGATAATCTATTAGATATGTTAGTTC     |       |
| cgd2_3260 | AGCAAGTTCAAAGTAAGCCTTATCTTGACAGAGCCAGGAACAAGTGGTCTAAGAAAGAAAAACCGTGTATTTATGGAAGGAACCTTACTTGGCTAACTTTATTGAATCATACTTCCAATCATTCCCACCTGAAAAATTTTGAAGGTGCAACACTT    |       |
| cgd2_3270 | AGAAGTTCAAATATCTCCTTATCTTGATCAAAAGCCAGGAACAAGTGGTCTAAGAAAGAAAAACCGTGTATTTATGGAAGGAACCTTACTTGGCTAACTTTATTGAATCATACTTCCAATCATTCCCACCTGAAAAATTTTGAAGGTGCAACACTT   |       |
| cgd2_3260 | TTGTAGCTGGCGATGGTAGATTCTTCTACCAGAAGCAATACAAATATTTCGAAATTTGTCAGCACATAAAGTAAAGGATTTGGACTGGTGTAAAGCTTATGTTCAACACCAGCAGGAGTGTATCATAAGAGAAAGAGAAGCGG                |       |
| cgd2_3270 | TTGTAGCTGGCGATGGTAGATTCTTCTACCAGAAGCAATACAAATATTTCGAAATTTGTCAGCACATAAAGTAAAGGATTTGGACTGGTGTAAAGCTTATGTTCAACACCAGCAGGAGTGTATCATAAGAGAAAGAGAAGCGG                |       |
| cgd2_3260 | TATTCAGTCGGTGAATCTTATTAAACAGCTTCACACAACCCAGGTGGTATTGATGAGGACTTTGGAGTTAAATTTAAACGGAAGAATGGTGGCCAGCTCAAGATTCGGTACCAATACAAATTTTTGAAATACAAAAAATAACATCATATA         |       |
| cgd2_3270 | TATTCAGTCGGTGAATCTTATTAAACAGCTTCACACAACCCAGGTGGTATTGATGAGGACTTTGGAGTTAAATTTAAACGGAAGAATGGTGGCCAGCTCAAGATTCGGTACCAATACAAATTTTTGAAATACAAAAAATAACATCATATA         |       |
| cgd2_3260 | AGAAGATTTCACTTCTTAAATGATTAAAGTAAATTTGGCGTGAGGAATTAATACCCAATCAATTTACCGTCGAAGTAATAGATACATCTGAAGATTTGGCTAAAATTAATGAAAAAGATATTGATTTCGAAAGATTCAAAATCTACTTAAT        |       |
| cgd2_3270 | AGAAGATTTCACTTCTTAAATGATTAAAGTAAATTTGGCGTGAGGAATTAATACCCAATCAATTTACCGTCGAAGTAATAGATACATCTGAAGATTTGGCTAAAATTAATGAAAAAGATATTGATTTCGAAAGATTCAAAATCTACTTAAT        |       |
| cgd2_3260 | AGAAAAGATTTTAAATGGCTTTTGATTCTATGATCGTGGTGGCTGGACCATATGCAAGAAAACCTCTTTTGGACGAATTTGGATTGCCAGAAAGTTCAATGTTACATTTGGAATCAAAAGCAGATTTTGGAGGGCTTCATCCTGATCCAAATCT     |       |
| cgd2_3270 | AGAAAAGATTTTAAATGGCTTTTGATTCTATGATCGTGGTGGCTGGACCATATGCAAGAAAACCTCTTTTGGACGAATTTGGATTGCCAGAAAGTTCAATGTTACATTTGGAATCAAAAGCAGATTTTGGAGGGCTTCATCCTGATCCAAATCT     |       |
| cgd2_3260 | TACTTATGAAAAAGACTTAGTTGAATTAATGAAAGTAAATCTCCAGAAAAAGTTGATAAAACACAGCCAGATTTTGGTGCTGCTGGAGATGGTACTGTGATAGAAATATGATTTGGTAAAGGATCTTTGTTACCCCTTCAGATCTGTTG          |       |
| cgd2_3270 | TACTTATGAAAAAGACTTAGTTGAATTAATGAAAGTAAATCTCCAGAAAAAGTTGATAAAACACAGCCAGATTTTGGTGCTGCTGGAGATGGTACTGTGATAGAAATATGATTTGGTAAAGGATCTTTGTTACCCCTTCAGATCTGTTG          |       |
| cgd2_3260 | CAATTATTGTCATCATATGCAAAAGAAGCAATCCCATACTTCTCAAAGGATTTGGCTGGTGTCTCAAGATCTATGCCTACTAGTACTTCGCTCAATAATGTAGCAGAAAAGCTCGGAATCCCATGCTATGAGGTACCAACAGGATGGAATACTTT    |       |
| cgd2_3270 | CAATTATTGTCATCATATGCAAAAGAAGCAATCCCATACTTCTCAAAGGATTTGGCTGGTGTCTCAAGATCTATGCCTACTAGTACTTCGCTCAATAATGTAGCAGAAAAGCTCGGAATCCCATGCTATGAGGTACCAACAGGATGGAATACTTT    |       |
| cgd2_3260 | GGTAATTTAATGGATGCAAAAAATGATTGACATATGTGGTGAAGAATCTTTTGGACAGGAAGTGACCATATTCGTGAAAAGGATGGATTATGGCAGTGTGGCTTGGTTATCGATTCTAGCCACACAAGAAATCCAGACCCCAACAAAGCATTGGT    |       |
| cgd2_3270 | GGTAATTTAATGGATGCAAAAAATGATTGACATATGTGGTGAAGAATCTTTTGGACAGGAAGTGACCATATTCGTGAAAAGGATGGATTATGGCAGTGTGGCTTGGTTATCGATTCTAGCCACACAAGAAATCCAGACCCCAACAAAGCATTGGT    |       |
| cgd2_3260 | ATCTGTTGAGGATACCTAGGGAATTCGAAAAACATATGGAAGAACTACTACACTAGATTGATTACGAATCAATTTGAAACAGAAAAGCTGATCAATCTTTAAACATTTAAATCTTTAATGGAAGATCATCAGAAATTAAGAGAAATCA           |       |
| cgd2_3270 | ATCTGTTGAGGATACCTAGGGAATTCGAAAAACATATGGAAGAACTACTACACTAGATTGATTACGAATCAATTTGAAACAGAAAAGCTGATCAATCTTTAAACATTTAAATCTTTAATGGAAGATTCAGAAATTAAGAGAAATCA             |       |
| cgd2_3260 | TTAAACCATATGGTATGATATCAAAATTAAGTATAACTTACATATAATGATCCAGTAGATAAATCTGTCTGCAAAAAATCAGGGTTTAAAGATTATCTTTTCAAGGATAACTCCAGAGTTGTTTCCGCCATCATCAGGTACAGGTCAGTAGGAGCA   |       |
| cgd2_3270 | TCGGTTCAAGTGGGTTGAAGGTTAATGATTAAGTATAACTTACATATAATGATCCAGTAGATAAATCTGTCTGCAAAAAATCAGGGTTTAAAGATTATCTTTTCAAGGATAACTCCAGAGTTGTTTCCGCCATCATCAGGTACAGGTCAGTAGGAGCA |       |
| cgd2_3260 | ACAATTCGAATTTACATGAAAGAGCTGTGAGTGATCAACAAAAGTTAATAGCATCAACGAAATCTTGGCGATTGATTGAGATAGTTGAGAAAAAGATTAATTAAGAAGATCGACAGGAAGATAGGCCAATGTTATAACTTAA                 |       |
| cgd2_3270 | ACTATTAGGATATATGAGAGAGCTGTAAAAACCTCAGGAATTTGAAAAACAACCAACAGCTCTAAATCACTTAATTGAGATAGTTGAGAAAAAGATTAATTAAGAAGATTACTGGTAGAAGCAAGCTACAGTAATTACTTAA                 |       |

### Protein sequence alignment

|         |                                                                                                                                                      |     |     |     |     |     |     |     |     |     |     |     |     |     |     |
|---------|------------------------------------------------------------------------------------------------------------------------------------------------------|-----|-----|-----|-----|-----|-----|-----|-----|-----|-----|-----|-----|-----|-----|
| CpPGM1A | 10                                                                                                                                                   | 20  | 30  | 40  | 50  | 60  | 70  | 80  | 90  | 100 | 110 | 120 | 130 | 140 | 150 |
| CpPGM1B | MMKILNLFSLVLVSQYVNNANESVGNLRYLKINLIEPTDGGQKVVTSQDVQINGRALIKKKVSVTRNVIEETETETYYYSDDKGLDAWSPNENDNLLDMLVQEQISPYLDQPKGTSGLRKKTRVFMEGTYLANFIESYFQSFPPENF  |     |     |     |     |     |     |     |     |     |     |     |     |     |     |
| CpPGM1A | 160                                                                                                                                                  | 170 | 180 | 190 | 200 | 210 | 220 | 230 | 240 | 250 | 260 | 270 | 280 | 290 | 300 |
| CpPGM1B | EGATLLVAGDGRFFLPEAIQIIEIAAAHKVKRIWTGVNGLCSTPAGSAIIREREGLIAGVGILLTASHNPGGIDEDFGVKFNEKNGGPAQDSVTNTIFEITKKLTSYKKISLPKIDLSKIGVQELIPNQFTVEVIDTSEDWLKMKKIF |     |     |     |     |     |     |     |     |     |     |     |     |     |     |
| CpPGM1A | 310                                                                                                                                                  | 320 | 330 | 340 | 350 | 360 | 370 | 380 | 390 | 400 | 410 | 420 | 430 | 440 | 450 |
| CpPGM1B | DFQKIQNLNRKDFKMAFDSMHGVAGPYARKLFIDEFGLPESSLLHLESKPDFGGLHDPNPLYAKDLVELMKVKSPEKVDKSTPDFGAAGDGDGRNMLGKGFVTPSDSVAIISYAKEAIPYFSGLAGVSRSMPTSTSLNNVAEK      |     |     |     |     |     |     |     |     |     |     |     |     |     |     |
| CpPGM1A | 460                                                                                                                                                  | 470 | 480 | 490 | 500 | 510 | 520 | 530 | 540 | 550 | 560 | 570 | 580 | 590 | 600 |
| CpPGM1B | LGIPCYEPTGWKYFGNLDMAKMDIDGEEESFGTSDHIREKDLWAVLAWLSILAKNPDPKPLVSVDITREFWKTYGRNRYTRFDYESIETEKADQFFKHLNSLMEDHOKLREIIPKYPIDIKLTDNFYNDPVDKSVAKNGLRF       |     |     |     |     |     |     |     |     |     |     |     |     |     |     |
| CpPGM1A | 610                                                                                                                                                  | 620 | 630 | 640 | 650 | 660 | 670 |     |     |     |     |     |     |     |     |
| CpPGM1B | IFQDNRVVFRLSGTGSVGATIRIYIEKTVSDQTKVNSTSNEILGDLIEIVEKKIKLKESTGRDRPTVIT                                                                                |     |     |     |     |     |     |     |     |     |     |     |     |     |     |

antigen site
