# Supplementary material for: Implication of Potential Differential Roles of the Two Phosphoglucomutase Isoforms in the Protozoan Parasite Cryptosporidium parvum
Source: MDPI journal article supplement (doi:10.3390/pathogens11010021), 2021-12-24
Supplement: s1 [file s1]

**Table S1.** Counts of CpPGM1A and CpPGM1B in mass spectrum-based proteomics\*

| Experiment                                 | Sample                                 | CpPGM1A    |            | CpPGM1B   |           |
|--------------------------------------------|----------------------------------------|------------|------------|-----------|-----------|
|                                            |                                        | Sequences  | Spectra    | Sequences | Spectra   |
| Enriched cytoskeletal & membrane fractions | 1D Gel 16May2006                       | 6          | 20         | 3         | 8         |
| Enriched cytoskeletal & membrane fractions | 1D Gel 24Jun2006                       | 2          | 3          | 1         | 2         |
| Oocyst Wall proteome (IowaII)              | Intact Oocysts                         | 16         | 33         | 0         | 0         |
| Oocyst Wall proteome (IowaII)              | Oocyst walls                           | 9          | 15         | 0         | 0         |
| Oocyst Wall proteome (IowaII)              | Sporozoites                            | 13         | 30         | 0         | 0         |
| Proteome during sporozoite excystation     | Soluble excysted/non-excysted LC-MS/MS | 9          | 50         | 0         | 0         |
| Sporozoite proteome (IowaII)               | 1D Gel LC-MS/MS                        | 22         | 57         | 3         | 3         |
| Sporozoite proteome (IowaII)               | 2D Gel LC-MS/MS                        | 5          | 9          | 0         | 0         |
| Sporozoite proteome (IowaII)               | MudPit insoluble fractions             | 7          | 7          | 8         | 11        |
| Sporozoite proteome (IowaII)               | MudPit soluble fractions               | 21         | 32         | 0         | 0         |
| <b>Total counts</b>                        |                                        | <b>110</b> | <b>256</b> | <b>15</b> | <b>24</b> |

\*Data were extracted from CryptoDB (<https://www.cryptodb.org>)
