# Supplementary material for: Implication of Potential Differential Roles of the Two Phosphoglucomutase Isoforms in the Protozoan Parasite Cryptosporidium parvum
Source: MDPI journal article supplement (doi:10.3390/pathogens11010021), 2021-12-24

**Figure S4.**

Immunofluorescence assay (IFA) labeling of CpPGM1A and CpPGM1B in sporozoites (A) and intracellular parasites (B). Samples were fixed with cold methanol. **DIC**, differential phase contrast microscopy; **DAPI**, 4,6-diamidino-2-phenylindole (for counter-staining nuclei); **Alexa Fluor 488**, fluorophore used for IFA-labeling of CpPGM1A or CpPGM1B protein

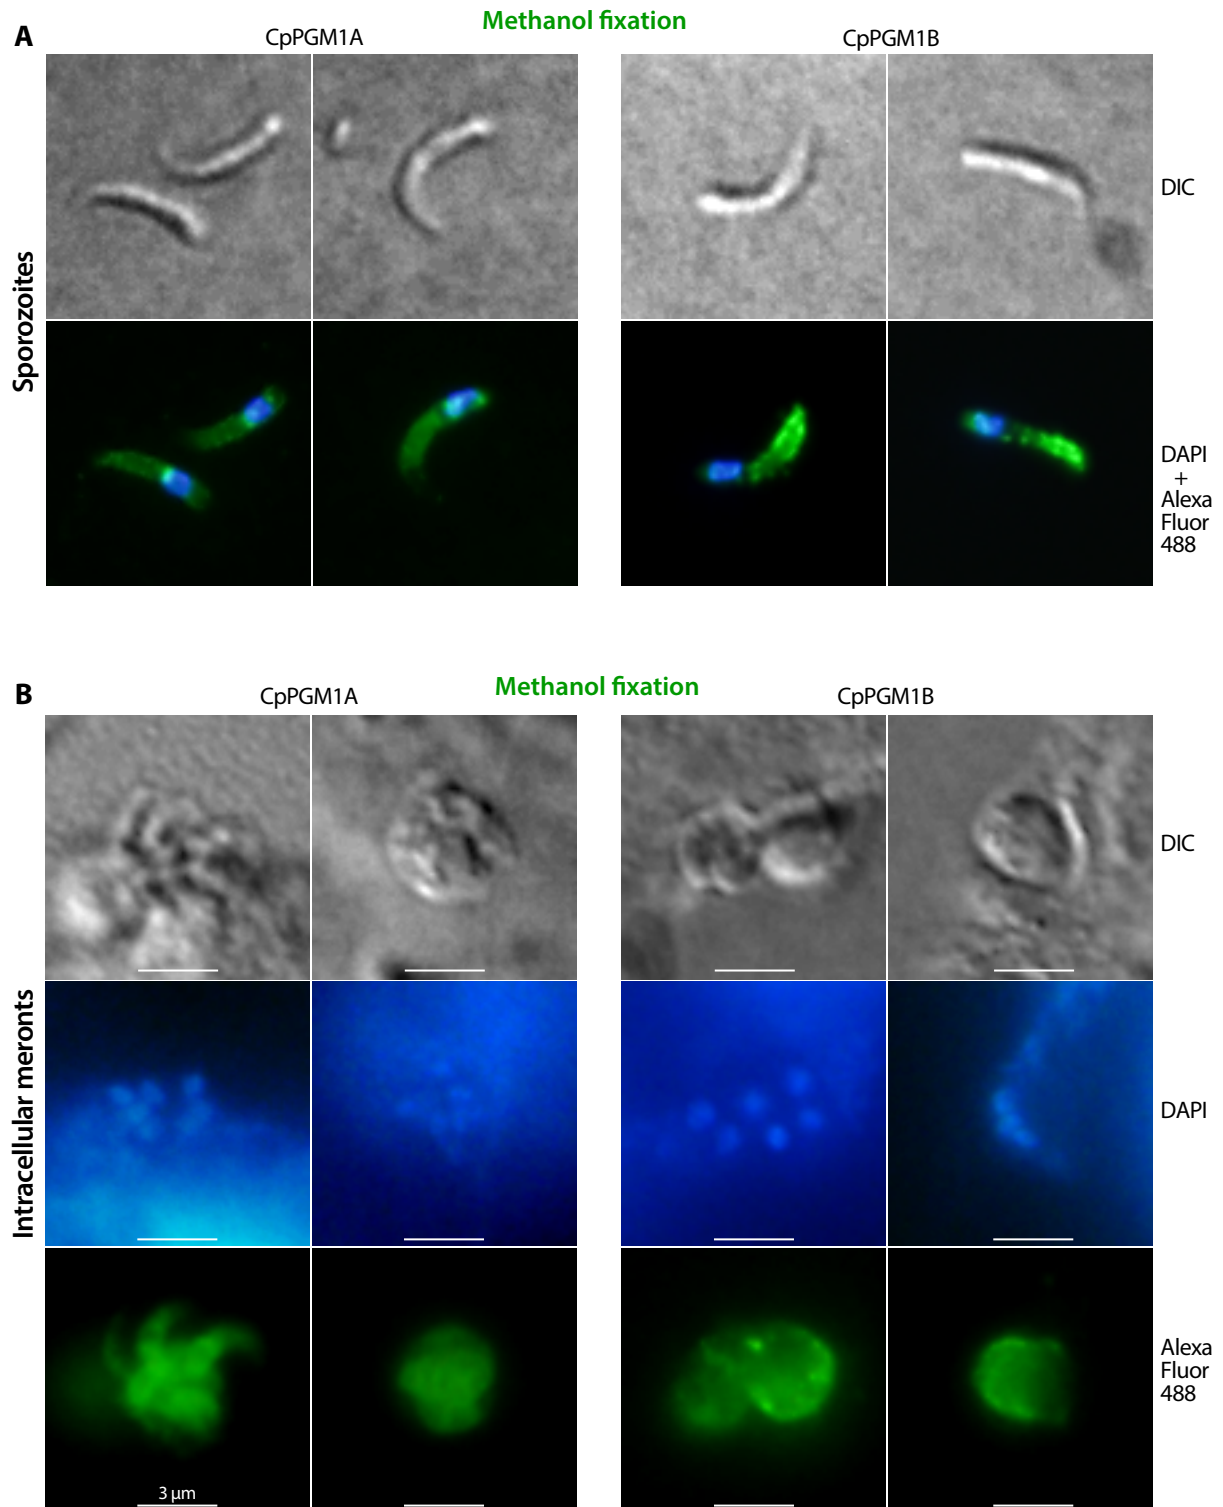

Supplement: s1 [file s1]
