# Supplementary material for: Implication of Potential Differential Roles of the Two Phosphoglucomutase Isoforms in the Protozoan Parasite Cryptosporidium parvum
Source: Pathogens. 2021 Dec 24;11(1):21. doi: 10.3390/pathogens11010021 (PMC8781159; doi:10.3390/pathogens11010021)
Supplement: Supplementary file 1 [file pathogens-11-00021-s001.zip]

Archive with 5 entries (5 files):
- figure S1.pdf
- figure S2.pdf
- figure S3.pdf
- figure S4.pdf
- Table S1.pdf
